# Supplementary material for: Genome-Wide Association Studies Provide Insights into the Genetic Determination of Flower and Leaf Traits of Actinidia eriantha
Source: Front Plant Sci. 2021 Aug 20;12:730890. doi: 10.3389/fpls.2021.730890 (PMC8417775; doi:10.3389/fpls.2021.730890)
Supplement: Supplementary Material 1 — PCR verification primers and the results on 143 Actinidia eriantha genotypes. [file Table_1.xlsx]

## Sheet: Sheet1
Chr		Chr 05		Chr 24
Position		19338016		13872137
Ref		G		C
Mut		A		T
Chr 05 SNP F: GCTAGTTACTGTAGACTAGT R: TTGGTCATCTGGAATGCAAT Product size: 322 bp Tm: 52℃
Chr 24 SNP F: GACACGTGGCATTAAGTAATG R: CCATCACCATTCATAGCGAC Product size: 357 bp Tm: 52.6℃
1|1 represents a homozygous mutation, 0|1 represents a heterozygous mutation, 0|0 represents the same as the reference
Code	Genotype	RAD-Seq	Sanger	RAD-Seq	Sanger
1	JG21	0|0	G	0|0	C
2	JG22	0|0	G	0|0	C
3	JG26	0|0	G	0|0	C
4	JG31	0|0	G	0|0	C
5	JG32	0|0	G	0|0	C
6	JG33	0|0	G	0|0	C
7	JG34	0|0	G	0|0	C
8	JG35	0|0	G	0|0	C
9	JG37	0|0	G	0|0	C
10	JG39	0|0	G	0|0	C
11	JG41	0|0	G	0|0	C
12	JG42	1|1	A	0|0	C
13	JG43	0|0	G	0|0	C
14	MG1	0|0	G	0|1	C
15	MG3	0|0	G	0|0	C
16	MG4	0|0	G	0|0	C
17	MG5	0|0	G	0|0	C
18	MG6	0|0	G	0|0	C
19	MG7	0|0	G	0|0	C
20	MG8	0|0	G	0|0	C
21	MG9	0|1	A/G	0|0	C
22	MG10	0|0	G	0|0	C
23	MG11	0|0	G	0|0	C
24	MG12	0|0	G	0|0	C
25	MG13	0|1	A/G	0|0	C
26	MG14	0|0	G	0|0	C
27	MG15	0|0	G	0|0	C
28	MG16	0|0	G	1|1	T
29	MG17	0|0	G	0|0	C
30	MG18	0|0	G	0|0	C
31	MG19	0|0	G	1|1	T
32	MG20	0|0	G	0|0	C
33	MG21	0|0	G	0|0	C
34	MG22	0|0	G	0|0	C
35	MG23	0|0	G	0|0	C
36	MG25	0|0	G	0|0	C
37	MG26	0|0	G	1|1	T
38	MG27	0|0	G	0|0	C
39	MG28	0|0	G	0|0	C
40	MG29	0|0	G	1|1	T
41	MG30	1|1	A	0|0	C
42	MG31	1|1	A	0|0	C
43	MG32	0|0	G	0|0	C
44	MG33	0|0	G	0|0	C
45	MG34	0|1	A/G	0|0	C
46	MG35	1|1	A	0|0	C
47	MG36	0|0	G	0|0	C
48	MG37	0|0	G	1|1	T
49	MG38	0|0	G	0|0	C
50	MG39	0|0	G	1|1	T
51	MG40	0|0	G	0|0	C
52	MG41	1|1	A	0|0	C
53	MG43	0|1	A/G	0|0	C
54	MG44	0|0	G	0|0	C
55	MG51	0|0	G	1|1	T
56	MG52	0|0	G	0|0	C
57	MG53	0|0	G	0|0	C
58	MG54	0|0	G	0|0	C
59	MG55	1|1	A	1|1	T
60	MG57	0|0	G	1|1	T
61	MG58	0|0	G	0|0	C
62	MG59	0|0	G	0|0	C
63	MG60	0|0	G	0|0	C
64	MG61	0|0	G	0|0	C
65	MG62	0|0	G	0|0	C
66	MG63	0|0	G	0|0	C
67	MG64	0|0	G	1|1	T
68	MG65	0|1	A/G	0|0	C
69	MG66	0|0	G	1|1	T
70	MG67	0|0	G	1|1	T
71	MG68	0|0	G	0|0	C
72	MG69	0|1	A/G	1|1	T
73	MG70	0|0	G	1|1	T
74	MG71	0|0	G	0|0	C
75	MG72	0|0	G	0|0	C
76	MG73	0|0	G	0|0	C
77	MG74	0|0	G	0|0	C
78	MG75	0|0	G	0|1	C
79	MG76	0|0	G	1|1	T
80	MG79	0|0	G	0|0	C
81	MG81	0|0	G	0|0	C
82	MG82	0|0	G	0|0	C
83	MG83	0|0	G	0|0	C
84	MG84	0|1	A/G	0|0	C
85	MG86	1|1	A	0|0	C
86	MG87	0|1	A/G	0|0	C
87	MG88	0|0	G	0|0	C
88	MG89	0|1	A/G	0|0	C
89	MG90	0|0	G	0|0	C
90	MG91	1|1	A	0|0	C
91	MG92	1|1	A	0|0	C
92	MG94	1|1	A	0|0	C
93	MG100	1|1	A	0|0	C
94	MG101	0|0	G	0|0	C
95	MG102	0|0	G	0|0	C
96	MG103	0|0	G	0|0	C
97	MG104	0|0	G	0|0	C
98	MG106	0|0	G	1|1	T
99	MG107	0|0	G	1|1	T
100	MG108	0|0	G	0|0	C
101	MG110	0|0	G	0|0	C
102	MG111	0|0	G	0|0	C
103	MG113	0|0	G	0|0	C
104	MG115	0|0	G	0|0	C
105	MG116	0|0	G	0|0	C
106	MG117	0|1	A/G	0|0	C
107	MG118	0|0	G	0|0	C
108	MG119	0|0	G	0|0	C
109	MG120	0|0	G	0|0	C
110	MG121	0|0	G	0|0	C
111	MG122	0|0	G	0|0	C
112	MG124	0|1	A/G	0|0	C
113	MG125	0|0	G	0|0	C
114	MG126	0|1	A/G	1|1	T
115	MG127	0|0	G	0|0	C
116	MG128	0|0	G	0|0	C
117	MG130	0|0	G	0|1	C
118	WF7	0|0	G	0|0	C
119	WF27	0|0	G	0|0	C
120	WF31	0|0	G	0|0	C
121	WF38	0|1	A/G	0|0	C
122	WF41	0|0	G	0|0	C
123	WF44	1|1	A	1|1	T
124	WF47	0|1	A/G	0|0	C
125	WF49	0|1	A/G	0|0	C
126	WF54	0|0	G	0|0	C
127	WF57	1|1	A	0|0	C
128	WF58	1|1	A	0|0	C
129	WG1	0|0	G	0|0	C
130	WG2	1|1	A	0|0	C
131	WG3	0|0	G	1|1	T
132	WG4	0|0	G	0|0	C
133	WG5	1|1	A	0|0	C
134	WG6	0|0	G	0|0	C
135	WG8	0|0	G	0|0	C
136	WG12	0|0	G	1|1	T
137	WG14	1|1	A	0|0	C
138	WG18	0|0	G	0|0	C
139	WG19	0|0	G	0|0	C
140	WG20	1|1	A	0|0	C
141	WG22	0|0	G	0|0	C
142	WG23	0|0	G	1|1	T
143	MG24	0|0	G	0|0	C
